# Supplementary material for: Opposite Associations between Individual KIAA0319 Polymorphisms and Developmental Dyslexia Risk across Populations: A Stratified Meta-Analysis by the Study Population
Source: Sci Rep. 2016 Jul 28;6:30454. doi: 10.1038/srep30454 (PMC4964335; doi:10.1038/srep30454)
Supplement: Supplementary Information [file srep30454-s1.pdf]

**Opposite Associations between Individual *KIAA0319* Polymorphisms and Developmental Dyslexia Risk across Populations: A Stratified Meta-Analysis by the Study Population**

Shanshan Shao<sup>1#</sup>, Yanfeng Niu<sup>2#</sup>, Xiaohui Zhang<sup>1</sup>, Rui Kong<sup>1</sup>, Jia Wang<sup>1</sup>, Lingfei Liu<sup>1</sup>, Xiu Luo<sup>1</sup>, Jiajia Zhang<sup>3</sup>, Ranran Song<sup>1\*</sup>

<sup>#</sup> S. S. and Y.N. contributed equally to the work.

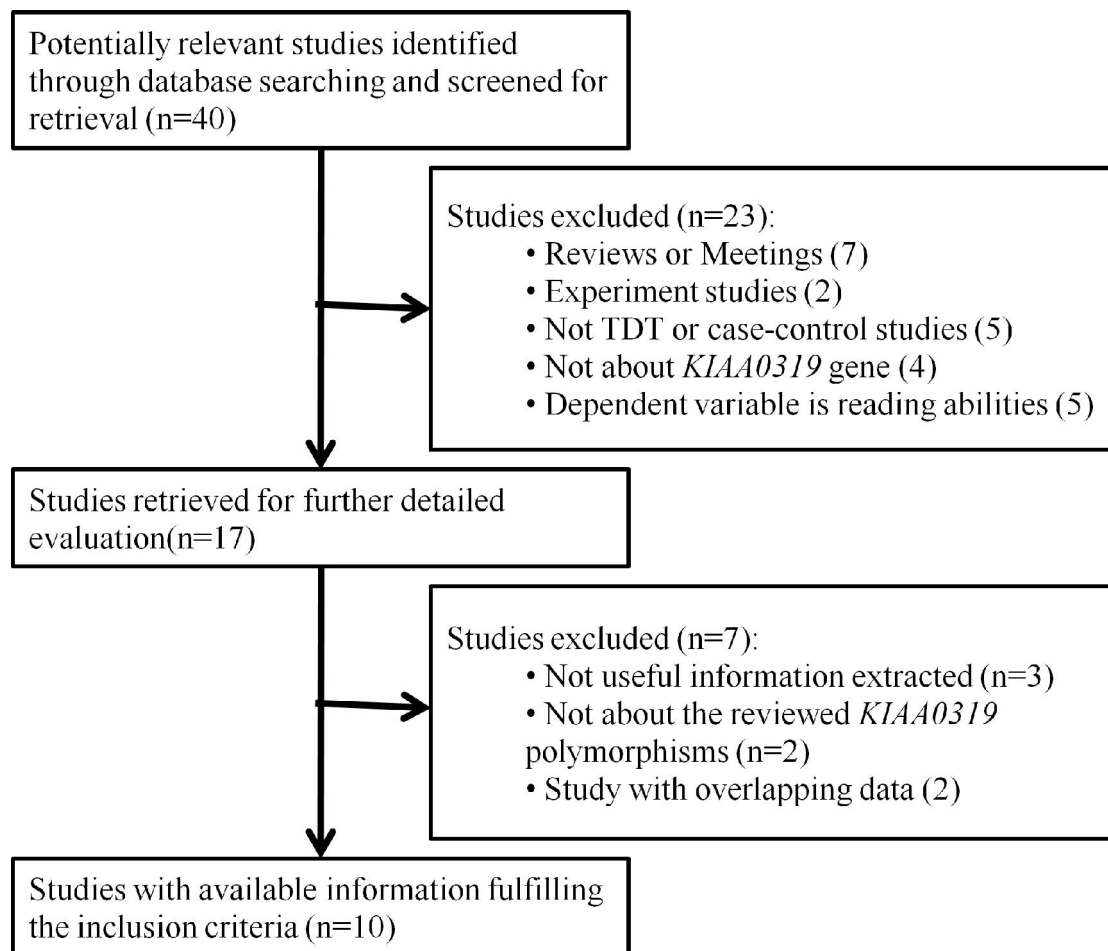

**Supplementary Figure S1** The comprehensive literature search and study selection procedures for *KIAA0319* polymorphisms and developmental dyslexia risk

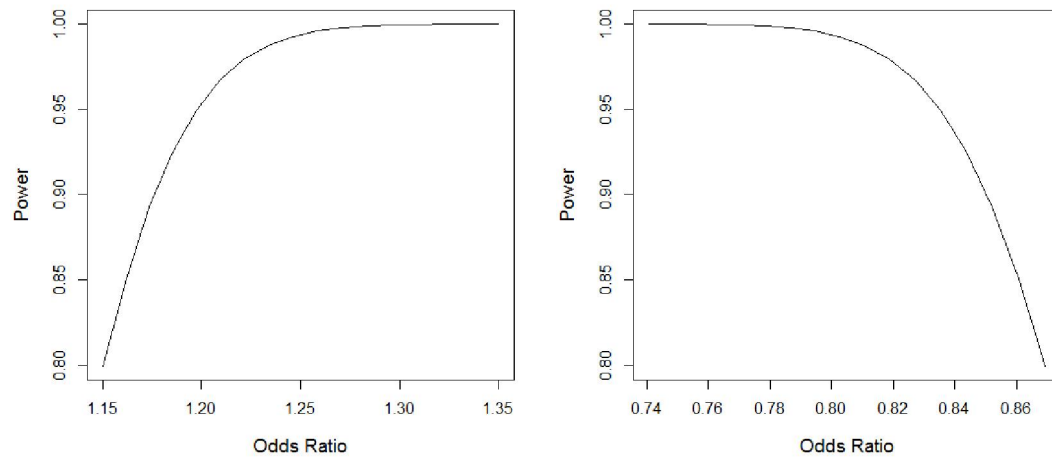

**Supplementary Fig. S2** The power curves given the standard deviation of 0.05 and the odds ratio from 1.15 to 1.35 (left) or from 0.74 to 0.87 (right)
